# Supplementary material
Source: HighWire-hosted journal article supplement (https://bmjopensem.bmj.com/content/9/3/e001573)
Supplement: inline-supplementary-material-5 [file inline-supplementary-material-5.pdf]

**Table 1: Musculoskeletal health conditions in retired elite rugby players**

| Author (Year)       | Population               |                        |                       |                                                 | Control Group (Yes/No); Description of Control Group                                                       | Study Design and Aim                                                                                                                                                | Assessment Method (and Scoring System used where relevant) | Health condition reported on                                                                               | Outcome                                             | Comparator group    |
|---------------------|--------------------------|------------------------|-----------------------|-------------------------------------------------|------------------------------------------------------------------------------------------------------------|---------------------------------------------------------------------------------------------------------------------------------------------------------------------|------------------------------------------------------------|------------------------------------------------------------------------------------------------------------|-----------------------------------------------------|---------------------|
|                     | No of participants & Age | Nationality & Gender   | Rugby Union or League | Mean career duration (in years) & Years retired |                                                                                                            |                                                                                                                                                                     |                                                            |                                                                                                            |                                                     |                     |
| Brauge et al, 2015  | N=101<br>40.4 (SD 2.3)   | France<br>Male         | Union                 | C: 16.4 (SD 3.1)<br><br>R: 5.8 (SD 3.5)         | Yes N=85<br><br>Age: 41.6 (SD 4.5)<br>Matched for sex, age, job, current sport training and smoking habits | Cross sectional study: To find out if retired professional rugby players experienced more serious degenerative cervical spine symptoms than the general population. | Questionnaire<br><br>Neck disability Index (NDI) > 15      | Neck pain<br><br>Disabling neck pain                                                                       | 50.50%<br>Statistically sig (p = 0.01)<br><br>2.97% | 31.76%<br><br>1.18% |
| Davies et al., 2017 | N=259<br>60.1 (SD 16.1)  | United Kingdom<br>Male | Union                 | C: NI<br>R: NI                                  | No                                                                                                         | Cross sectional study: To assess morbidity and health related quality of life amongst former rugby players, compared to an age-standardised general                 | Questionnaire self-reported, physician diagnosed           | Osteoporosis<br><br>Osteoarthritis<br><br>Joint replacement<br><br>Hip replacement<br><br>Knee replacement | 4%<br><br>60%<br><br>24%<br><br>15%<br><br>9%       | NI                  |

|                       |                         |                        |                |                            |                                                                                                                                                        | population sample                                                                                                                                                 |                                                                            |                                |                         |                           |
|-----------------------|-------------------------|------------------------|----------------|----------------------------|--------------------------------------------------------------------------------------------------------------------------------------------------------|-------------------------------------------------------------------------------------------------------------------------------------------------------------------|----------------------------------------------------------------------------|--------------------------------|-------------------------|---------------------------|
| Hind et al., 2020     | N=83<br>43.4 (SD 9.4)   | United Kingdom<br>Male | League & Union | C: NI<br>R: NI             | Yes<br>N=106<br>Former amateur rugby players (AR)<br>Age: 48.3 (SD 11.0)<br><br>N=65<br>retired non-contact sport athletes (NC)<br>Age: 48.7 (SD 12.9) | Cross sectional study: To describe cumulative injuries and their perceived effect in retired professional rugby players compared to retired non-contact athletes. | Questionnaire                                                              | Back pain                      | 80%                     | AR: 75%<br>NC: 69%        |
|                       |                         |                        |                |                            |                                                                                                                                                        |                                                                                                                                                                   |                                                                            | Severe and regular joint pain  | 64%                     | AR 53%<br>NC: 47%         |
|                       |                         |                        |                |                            |                                                                                                                                                        |                                                                                                                                                                   |                                                                            | Osteoarthritis                 | 51%<br>p<0.05)          | AR 36%<br>NC: 22%         |
| Jones et al., 2019    | N=127<br>60.4 (SD 16.0) | United Kingdom<br>Male | Union          | C: NI<br>R: 27.7 (SD 16.0) | Yes<br>N=127<br>Former professional cricket players<br>Age: 56.4 (SD 14)                                                                               | Cross sectional study: To establish the prevalence of hand and wrist osteoarthritis in retired elite rugby and cricket players                                    | Questionnaire                                                              | Hand OA (physician diagnosed)  | 3.6% (95% CI 1.5-8.4%)  | 2.4% (95% CI 0.8-7.2%)    |
|                       |                         |                        |                |                            |                                                                                                                                                        |                                                                                                                                                                   | Questionnaire                                                              | Wrist OA (physician diagnosed) | 2.1% (95% CI 0.7%-6.5%) | 1.6% (95% CI 0.4-6.2%)    |
|                       |                         |                        |                |                            |                                                                                                                                                        |                                                                                                                                                                   | Questionnaire<br>National Health and Nutrition Examination Survey (NHANES) | Hand pain                      | 10.0% (CI 6.0-16.3%)    | 19.7% (95% CI 13.6-27.6%) |
| McMillan et al., 2017 | N=127<br>53.5 (SD 13.0) | United Kingdom<br>Male | Union          | C: 22.4 (5.0)              | Yes<br>N=29<br>Matched for age and                                                                                                                     | Cross sectional study: To explore long term health                                                                                                                | Self-report inventory                                                      | Chronic orthopaedic problems   | 14%                     | 3%                        |

|                       |                           |                            |       |                                         |                                                                                       |                                                                                                                                                         |               |                                      |                               |                                 |
|-----------------------|---------------------------|----------------------------|-------|-----------------------------------------|---------------------------------------------------------------------------------------|---------------------------------------------------------------------------------------------------------------------------------------------------------|---------------|--------------------------------------|-------------------------------|---------------------------------|
|                       |                           |                            |       | R: 20.3<br>(12.8)                       | social<br>deprivation                                                                 | outcomes after<br>exposure to<br>repeated<br>concussions in<br>elite level rugby<br>union players                                                       |               |                                      |                               |                                 |
| Paget et al.,<br>2020 | N=152<br>40.0 (SD<br>6.0) | Inter-<br>national<br>Male | Union | C: 10 (2-<br>20)<br><br>R: 8 (0-<br>22) | Yes<br>N=401<br>Retired<br>professional<br>football<br>players<br>Age: 36 (25-<br>50) | Cross sectional<br>study: To<br>establish the<br>prevalence of<br>ankle<br>osteoarthritis in<br>former<br>professional<br>rugby and<br>football players | Questionnaire | Ankle OA<br>(physician<br>diagnosed) | 4.6% (95%<br>CI 1.2-<br>8.0%) | 9.2% (95%<br>CI 6.4 –<br>12.1%) |

N = number of participants, SD = Standard Deviation, NI = Not identified, AR = former amateur rugby players, NC = retired non-contact athletes, C= mean career duration (year), R= mean years since retirement, OA= osteoarthritis.

**Table 2: Cardiovascular health conditions in retired elite rugby players**

| Author (Year)       | Population               |                        |                       |                                                 | Control Group (Yes/No); Description of Control Group | Study Design and Aim                                                                                                                                                  | Assessment Method (and Scoring System used where relevant) | Health condition reported on       | Outcome        | Comparator group |
|---------------------|--------------------------|------------------------|-----------------------|-------------------------------------------------|------------------------------------------------------|-----------------------------------------------------------------------------------------------------------------------------------------------------------------------|------------------------------------------------------------|------------------------------------|----------------|------------------|
|                     | No of participants & Age | Nationality & Gender   | Rugby Union or League | Mean career duration (in years) & Years retired |                                                      |                                                                                                                                                                       |                                                            |                                    |                |                  |
| Davies et al., 2017 | N=259<br>60.1 (SD 16.1)  | United Kingdom<br>Male | Union                 | C: NI<br>R: NI                                  | No                                                   | Cross sectional study: To assess morbidity and health related quality of life amongst former rugby players, compared to an age-standardised general population sample | Questionnaire self-reported, physician diagnosed           | Heart problems<br><br>Hypertension | 18%<br><br>28% | NI               |
| Gallo et al., 2021  | N=143<br>70              | United Kingdom<br>Male | Union                 | C: 15.8 (SD 5.4)<br>R: NI                       | No                                                   | Cross sectional study: To assess long term association between concussions and cognitive function among retired elite rugby players                                   | Questionnaire                                              | Hypertension                       | 31.5%          |                  |

|                       |                            |                        |       |                                           |                                                       |                                                                                                                                       |                       |                         |    |     |
|-----------------------|----------------------------|------------------------|-------|-------------------------------------------|-------------------------------------------------------|---------------------------------------------------------------------------------------------------------------------------------------|-----------------------|-------------------------|----|-----|
| McMillan et al., 2017 | N=127<br>53.5 (SD<br>13.0) | United Kingdom<br>Male | Union | C: 22.4<br>(5.0)<br><br>R: 20.3<br>(12.8) | Yes<br>N=29<br>Matched for age and social deprivation | Cross sectional study: To explore long term health outcomes after exposure to repeated concussions in elite level rugby union players | Self-report inventory | Cardiovascular disorder | 2% | 21% |
|-----------------------|----------------------------|------------------------|-------|-------------------------------------------|-------------------------------------------------------|---------------------------------------------------------------------------------------------------------------------------------------|-----------------------|-------------------------|----|-----|

N = number participants, SD = Standard Deviation, NI = Not identified, C= mean career duration (year), R= mean years since retirement

**Table 3: Neurocognitive health conditions in retired elite rugby players**

| Author (Year)       | Population               |                        |                       |                                                 | Control Group (Yes/No); Description of Control Group                                                       | Study Design and Aim                                                                                                                                                | Assessment Method (and Scoring System used where relevant) | Health condition reported on | Outcome | Comparator group |
|---------------------|--------------------------|------------------------|-----------------------|-------------------------------------------------|------------------------------------------------------------------------------------------------------------|---------------------------------------------------------------------------------------------------------------------------------------------------------------------|------------------------------------------------------------|------------------------------|---------|------------------|
|                     | No of participants & Age | Nationality & Gender   | Rugby Union or League | Mean career duration (in years) & Years retired |                                                                                                            |                                                                                                                                                                     |                                                            |                              |         |                  |
| Brauge et al, 2015  | N=101<br>40.4 (SD 2.3)   | France<br>Male         | Union                 | C: 16.4 (SD 3.1)<br>R: 5.8 (SD 3.5)             | Yes N=85<br><br>Age: 41.6 (SD 4.5)<br>Matched for sex, age, job, current sport training and smoking habits | Cross sectional study: To find out if retired professional rugby players experienced more serious degenerative cervical spine symptoms than the general population. | Japanese Orthopaedic Association (JOA)                     | Neurological abnormalities   | 0.99%   | NI               |
| Davies et al., 2017 | N=259<br>60.1 (SD 16.1)  | United Kingdom<br>Male | Union                 | C: NI<br>R: NI                                  | No                                                                                                         | Cross sectional study: To assess morbidity and health related quality of life amongst former rugby players, compared to an age-standardised general                 | Questionnaire self-reported, physician diagnosed           | Dementia                     | 1%      | NI               |

|                       |                         |                        |        |                                 |                                                                        | population sample                                                                                                                                                       |                                                                           |                                                                                  |                     |                     |
|-----------------------|-------------------------|------------------------|--------|---------------------------------|------------------------------------------------------------------------|-------------------------------------------------------------------------------------------------------------------------------------------------------------------------|---------------------------------------------------------------------------|----------------------------------------------------------------------------------|---------------------|---------------------|
| Decq et al., 2015     | N=239<br>52 (49-55.75)  | France<br>Male         | Union  | C: NI<br>R: NI                  | Yes<br>N=138<br>Retired sportsmen registered on "high-level" lists     | Cross sectional study: To evaluate the prevalence of major depressive disorder, mild cognitive disorders and headache in retired high level sportsmen and rugby players | Self-questionnaire<br><br>Telephone Interview for Cognitive Status (TICS) | Reported Neurological disease<br><br>Mild cognitive disorders (TICS-m $\geq$ 30) | 2.93%<br><br>56.59% | 3.68%<br><br>40.35% |
| McMillan et al., 2017 | N=127<br>53.5 (SD 13.0) | United Kingdom<br>Male | Union  | C: 22.4 (5.0)<br>R: 20.3 (12.8) | Yes<br>N=29<br>Matched for age and social deprivation                  | Cross sectional study: To explore long term health outcomes after exposure to repeated concussions in elite level rugby union players                                   | Self-report inventory                                                     | Parkinson's                                                                      | 1.92%               | 0.0%                |
| Stanwell et al., 2022 | N=41<br>NI              | Australia<br>Male      | League | C: NI<br>R: NI                  | Yes<br>N=41<br>Healthy community controls similar in age and education | Cross sectional study: To explore the Cavum Septum Pellucidum (CSP) anatomic features and lateral ventricle size in retired elite rugby league players and controls     | Magnetic resonance imaging (MRI) scan                                     | Abnormal Cavum Septum Pellucidum (CSP)                                           | 61%                 | 41.5%               |

|                         |                            |                   |        |                |    |                                                                                                                                     |                                                                                              |                                                                            |                   |  |
|-------------------------|----------------------------|-------------------|--------|----------------|----|-------------------------------------------------------------------------------------------------------------------------------------|----------------------------------------------------------------------------------------------|----------------------------------------------------------------------------|-------------------|--|
| Van Patten et al., 2021 | N=133<br>55.0 (SD<br>13.9) | Australia<br>Male | League | C: NI<br>R: NI | No | Cross sectional study: To explore predictors and correlates of perceived cognitive decline in retired national rugby league players | Information questionnaire on Cognitive Decline in the Elder (IQCODE-Self)<br><br>IQCODE-Self | Cognitive decline (cut-off = 3.88)<br><br>Cognitive decline (cut-off 3.38) | 7.5%<br><br>28.6% |  |
|-------------------------|----------------------------|-------------------|--------|----------------|----|-------------------------------------------------------------------------------------------------------------------------------------|----------------------------------------------------------------------------------------------|----------------------------------------------------------------------------|-------------------|--|

N = number participants, SD = Standard Deviation, NI = Not identified, C= mean career duration (year), R= mean years since retirement



**Table 4: Psychological health conditions in retired elite rugby players**

| Author (Year)       | Population               |                        |                       |                                                 | Control Group (Yes/No); Description of Control Group               | Study Design and Aim                                                                                                                                                  | Assessment Method (and Scoring System used where relevant)                      | Health condition reported on                                      | Outcome             | Comparator group    |
|---------------------|--------------------------|------------------------|-----------------------|-------------------------------------------------|--------------------------------------------------------------------|-----------------------------------------------------------------------------------------------------------------------------------------------------------------------|---------------------------------------------------------------------------------|-------------------------------------------------------------------|---------------------|---------------------|
|                     | No of participants & Age | Nationality & Gender   | Rugby Union or League | Mean career duration (in years) & Years retired |                                                                    |                                                                                                                                                                       |                                                                                 |                                                                   |                     |                     |
| Davies et al., 2017 | N=259<br>60.1 (SD 16.1)  | United Kingdom<br>Male | Union                 | C: NI<br>R: NI                                  | No                                                                 | Cross sectional study: To assess morbidity and health related quality of life amongst former rugby players, compared to an age-standardised general population sample | Questionnaire self-reported, physician diagnosed                                | Anxiety<br><br>Depression                                         | 7%<br><br>6%        | NI                  |
| Decq et al., 2015   | N=239<br>52 (49-55.75)   | France<br>Male         | Union                 | C: NI<br>R: NI                                  | Yes<br>N=138<br>Retired sportsmen registered on "high-level" lists | Cross sectional study: To evaluate the prevalence of major depressive disorder, mild cognitive disorders and headache in retired high                                 | Self-questionnaire<br><br>Patient Health Questionnaire (PHQ-9) (PHQ-telephonic) | Reported depressive episodes<br><br>Depressive disorder PHQ-9 >9) | 12.61%<br><br>9.55% | 12.32%<br><br>6.72% |

|                          |                       |                                              |        |                            |                                                                                                                        |                                                                                                                                                 |                                                                                                                                                                            |                                                                                           |                                                                                      |                                       |
|--------------------------|-----------------------|----------------------------------------------|--------|----------------------------|------------------------------------------------------------------------------------------------------------------------|-------------------------------------------------------------------------------------------------------------------------------------------------|----------------------------------------------------------------------------------------------------------------------------------------------------------------------------|-------------------------------------------------------------------------------------------|--------------------------------------------------------------------------------------|---------------------------------------|
|                          |                       |                                              |        |                            |                                                                                                                        | level sportsmen and rugby players                                                                                                               |                                                                                                                                                                            |                                                                                           |                                                                                      |                                       |
| Gardner et al., 2017     | N=16<br>38.3 (SD 4.6) | NI<br>Male                                   | League | C: NI<br>R: 6.9            | Yes<br>N=16<br>Age-and education-matched controls who had no history of neurotrauma or participation in contact sports | Cross sectional study: To assess brain neurometabolite concentrations in retired league players who had a history of self-reported concussions  | Alcohol use disorder identification test (AUDIT)                                                                                                                           | Alcohol use disorder:<br>Abstainer<br>Low Risk<br>Hazardous level<br>Harmful<br>High risk | 0%<br>23.07%<br>53.84%<br>7.69%<br>15.38%                                            | 7.69%<br>76.93%<br>15.38%<br>0%<br>0% |
| Gouttebauge et al., 2015 | N=295<br>38 (SD 6.0)  | France,<br>South Africa,<br>Ireland.<br>Male | Union  | C: 9 (1-18)<br>R: 8 (1-25) | No                                                                                                                     | Cross sectional study: To establish the prevalence of symptoms of common mental health disorders among retired professional rugby union players | Four-dimensional symptom questionnaire (4DSQ)<br><br>12-item General Health Questionnaire (GHQ-12)<br><br>Patient reported outcome measurement information system (PROMIS) | Distress<br><br>Anxiety/<br>Depression<br><br>Sleeping disturbance                        | 24.8% (95CI 19.7-29.9)<br><br>28.4% (95 CI 23.1-33.7)<br><br>28.8% (95 CI 23.1-34.5) |                                       |

|                   |                       |                        |                |                |                                                                                                  |                                                                                                                                                                                                             |                                       |                                                |                                             |                  |
|-------------------|-----------------------|------------------------|----------------|----------------|--------------------------------------------------------------------------------------------------|-------------------------------------------------------------------------------------------------------------------------------------------------------------------------------------------------------------|---------------------------------------|------------------------------------------------|---------------------------------------------|------------------|
|                   |                       |                        |                |                |                                                                                                  |                                                                                                                                                                                                             | AUDIT-C                               | Adverse alcohol behaviour                      | 23.8% (95 CI 18.8-28.9)                     |                  |
|                   |                       |                        |                |                |                                                                                                  |                                                                                                                                                                                                             | Questionnaire                         | Adverse smoking behaviour                      | 15% (95 CI 10.8-19.3)                       |                  |
|                   |                       |                        |                |                |                                                                                                  |                                                                                                                                                                                                             | Questionnaire                         | Adverse nutrition behaviour                    | 61.9% (95 CI 56.1-67.7)                     |                  |
| Hind et al., 2022 | N=83<br>43.4 (SD 9.4) | United Kingdom<br>Male | League & Union | C: NI<br>R: NI | Yes<br>N=106<br>Retired Amateur rugby athletes (AR)<br>N=65<br>Retired Non-contact athletes (NC) | Cross sectional study: To investigate whether there were differences in mental health, sleep, and alcohol use between retired elite and amateur rugby code players compared to retired non-contact athletes | Spielberger Anger Expression Scale    | Irritability                                   | 52%<br>ERvNC<br>p<0.001                     | AR 18%<br>NC 43% |
|                   |                       |                        |                |                |                                                                                                  |                                                                                                                                                                                                             | General Health Questionnaire (GHQ-12) | Depression                                     | 49%<br>ERvNC<br>p=0.001<br>ERvAR<br>p=0.043 | AR 34%<br>NC 21% |
|                   |                       |                        |                |                |                                                                                                  |                                                                                                                                                                                                             | (GHQ-12)                              | Anxiety                                        | 42%<br>ERvAR<br>p=0.009                     | AR 23%<br>NC 31% |
|                   |                       |                        |                |                |                                                                                                  |                                                                                                                                                                                                             | AUDIT-C                               | Alcohol consumption (higher risk) ( $\geq 5$ ) | 59%                                         | AR 64%<br>NC 53% |
|                   |                       |                        |                |                |                                                                                                  |                                                                                                                                                                                                             | Insomnia Severity Index               | Difficulty falling asleep                      | 17%                                         | AR 6%<br>NC 7%   |
|                   |                       |                        |                |                |                                                                                                  |                                                                                                                                                                                                             |                                       | Waking in night and taking a long              | 34%                                         | AR 19%<br>NC 17% |

|                      |                         |                     |        |                |                                                                                                                                                            |                                                                                                                                                                                                              |                                                    |                                                                                                        |                                |                     |
|----------------------|-------------------------|---------------------|--------|----------------|------------------------------------------------------------------------------------------------------------------------------------------------------------|--------------------------------------------------------------------------------------------------------------------------------------------------------------------------------------------------------------|----------------------------------------------------|--------------------------------------------------------------------------------------------------------|--------------------------------|---------------------|
|                      |                         |                     |        |                |                                                                                                                                                            |                                                                                                                                                                                                              |                                                    | time to fall back to sleep                                                                             |                                |                     |
|                      |                         |                     |        |                |                                                                                                                                                            |                                                                                                                                                                                                              |                                                    | Waking up too early                                                                                    | 35%                            | AR 19%<br>NC 12%    |
| Hume et al., 2022    | N=127<br>43 (SD 8.5)    | New Zealand<br>Male | Union  | C: NI<br>R: NI | Yes<br>N=271<br>Retired community (club or regional level) players (CR)<br>N=72<br>Retired non-contact sport (cricket or hockey) players at any level (NC) | Cross sectional study: To investigate the differences in self-reported sport injury history and current self-reported health characteristics between former New Zealand rugby and non-contact sport players. | Questionnaire                                      | Anxiety                                                                                                | 4.7%                           | CR: 7.7%<br>NC:6.9% |
|                      |                         |                     |        |                |                                                                                                                                                            |                                                                                                                                                                                                              | Questionnaire                                      | Depression                                                                                             | 11%                            | CR: 10%<br>NC: 9.5% |
|                      |                         |                     |        |                |                                                                                                                                                            |                                                                                                                                                                                                              | AUDIT                                              | Hazardous drinking                                                                                     | 38%                            | CR: 40%<br>NC25%    |
| Iverson et al., 2021 | N=141<br>52.6 (SD 13.8) | Australia<br>Male   | League | C: NI<br>R: NI | No                                                                                                                                                         | Cross sectional study: To examine predictors and correlates of depression in retired elite level rugby league players in Australia                                                                           | The Depression, Anxiety and Stress Scale (DASS-21) | <b>Depression</b><br>Normal (0-9)<br>Mild (10-13)<br>Moderate (14-20)<br>Severe/extremely severe (21+) | 70.9%<br>14.9%<br>9.9%<br>4.3% |                     |
|                      |                         |                     |        |                |                                                                                                                                                            |                                                                                                                                                                                                              | DASS-21                                            | <b>Anxiety</b><br>Normal (0-7)<br>Mild (8-9)<br>Moderate (10-14)                                       | 80.9%<br>7.8%<br>6.4%<br>5.0%  |                     |

|                         |                         |                        |        |                                     |                                                       |                                                                                                                                        |                       |                                         |       |       |
|-------------------------|-------------------------|------------------------|--------|-------------------------------------|-------------------------------------------------------|----------------------------------------------------------------------------------------------------------------------------------------|-----------------------|-----------------------------------------|-------|-------|
|                         |                         |                        |        |                                     |                                                       |                                                                                                                                        | DASS-21               | Severe/extremely severe (15+)           |       |       |
|                         |                         |                        |        |                                     |                                                       |                                                                                                                                        |                       | <b>Stress</b>                           | 73%   |       |
|                         |                         |                        |        |                                     |                                                       |                                                                                                                                        |                       | Normal (0-14)                           | 11.3% |       |
|                         |                         |                        |        |                                     |                                                       |                                                                                                                                        |                       | Mild (15-18)                            | 9.2%  |       |
|                         |                         |                        |        |                                     |                                                       |                                                                                                                                        |                       | Moderate (19-25)                        |       |       |
|                         |                         |                        |        |                                     |                                                       |                                                                                                                                        |                       | Severe/extremely severe (26+)           | 6.4%  |       |
|                         |                         |                        |        |                                     |                                                       |                                                                                                                                        | AUDIT                 | <b>Alcohol use</b>                      |       |       |
|                         |                         |                        |        |                                     |                                                       |                                                                                                                                        |                       | Low-risk                                | 55.3% |       |
|                         |                         |                        |        |                                     |                                                       |                                                                                                                                        |                       | Risky or hazardous level                | 37.6% |       |
|                         |                         |                        |        |                                     |                                                       |                                                                                                                                        |                       | High-risk or harmful level              | 5%    |       |
|                         |                         |                        |        |                                     |                                                       |                                                                                                                                        |                       | High-risk (likely dependence)           | 2.1%  |       |
|                         |                         |                        |        |                                     |                                                       |                                                                                                                                        | Questionnaire         | Recent cannabis use (past 6 months)     | 5.0%  |       |
|                         |                         |                        |        |                                     |                                                       |                                                                                                                                        | Questionnaire         | Recent illicit drug use (past 6 months) | 12.8% |       |
| McMillan et al., 2017   | N=127<br>53.5 (SD 13.0) | United Kingdom<br>Male | Union  | C: 22.4 (5.0)<br><br>R: 20.3 (12.8) | Yes<br>N=29<br>Matched for age and social deprivation | Cross sectional design: To explore long term health outcomes after exposure to repeated concussions in elite level rugby union players | Self-report inventory | Depression                              | 3.84% | 3.44% |
| Van Patten et al., 2021 | N=133                   | Australia<br>Male      | League | C: NI<br>R: NI                      | No                                                    | Cross sectional study: To                                                                                                              | DASS-21               | Depression mild (10-13)                 | 15.0% |       |

|                     |                       |                   |        |                 |                                                   |                                                                                                                                                  |               |                                                                                                                |                                      |                                        |
|---------------------|-----------------------|-------------------|--------|-----------------|---------------------------------------------------|--------------------------------------------------------------------------------------------------------------------------------------------------|---------------|----------------------------------------------------------------------------------------------------------------|--------------------------------------|----------------------------------------|
|                     | 55.0 (SD 13.9)        |                   |        |                 |                                                   | explore predictors and correlates of perceived cognitive decline in retired national rugby league players                                        | DASS-21       | Depression moderate (14-20)                                                                                    | 10.55%                               |                                        |
|                     |                       |                   |        |                 |                                                   |                                                                                                                                                  | DASS-21       | Depression severe (21+)                                                                                        | 4.5%                                 |                                        |
|                     |                       |                   |        |                 |                                                   |                                                                                                                                                  | AUDIT         | Alcohol use risky or hazardous level                                                                           | 36.8%                                |                                        |
|                     |                       |                   |        |                 |                                                   |                                                                                                                                                  | AUDIT         | Alcohol use high-risk or harmful level                                                                         | 4.5%                                 |                                        |
|                     |                       |                   |        |                 |                                                   |                                                                                                                                                  | AUDIT         | Alcohol use (likely dependence)                                                                                | 2.3%                                 |                                        |
|                     |                       |                   |        |                 |                                                   |                                                                                                                                                  | Questionnaire | Recent cannabis use (past 6 months)                                                                            | 5.3%                                 |                                        |
|                     |                       |                   |        |                 |                                                   |                                                                                                                                                  | Questionnaire | Recent illicit drug use (past 6 months)                                                                        | 12.8%                                |                                        |
| Wright et al., 2021 | N=11<br>37.6 (SD 5.0) | Australia<br>Male | League | C: NI<br>R: 6.8 | Yes<br>N=13<br>Age and education matched controls | Cross sectional study: Explore white matter microstructure using diffusion tensor imaging (DTI) in retired professional Australia National Rugby | AUDIT         | <b>Alcohol use</b><br>Abstainer<br>Low risk<br>Hazardous level<br>Harmful level<br>Probable alcohol dependence | 0%<br>36.4%<br>45.5%<br>9.1%<br>9.1% | 15.38%<br>69.23%<br>15.38%<br>0%<br>0% |

|  |  |  |  |  |  |                                                                                                                                                     |  |  |  |  |
|--|--|--|--|--|--|-----------------------------------------------------------------------------------------------------------------------------------------------------|--|--|--|--|
|  |  |  |  |  |  | League players with a history of self-reported concussions compared with age and education matched controls who have had no history of brain trauma |  |  |  |  |
|--|--|--|--|--|--|-----------------------------------------------------------------------------------------------------------------------------------------------------|--|--|--|--|

N = number participants, SD = Standard Deviation, NI = Not identified, AR = former amateur rugby players, NC = retired non-contact athletes, CR = Retired community level rugby players, C= mean career duration (year), R= mean years since retirement

**Table 5: Other health conditions in retired elite rugby players**

| Author (Year)       | Population               |                        |                       |                                                 | Control Group (Yes/No); Description of Control Group               | Study Design and Aim                                                                                                                                                  | Assessment Method (and Scoring System used where relevant) | Health condition reported on         | Outcome       | Comparator group |
|---------------------|--------------------------|------------------------|-----------------------|-------------------------------------------------|--------------------------------------------------------------------|-----------------------------------------------------------------------------------------------------------------------------------------------------------------------|------------------------------------------------------------|--------------------------------------|---------------|------------------|
|                     | No of participants & Age | Nationality & Gender   | Rugby Union or League | Mean career duration (in years) & Years retired |                                                                    |                                                                                                                                                                       |                                                            |                                      |               |                  |
| Davies et al., 2017 | N=259<br>60.1 (SD 16.1)  | United Kingdom<br>Male | Union                 | C: NI<br>R: NI                                  | No                                                                 | Cross sectional study: To assess morbidity and health related quality of life amongst former rugby players, compared to an age-standardised general population sample | Questionnaire self-reported, physician diagnosed           | Asthma<br><br>Diabetes               | 10%<br><br>2% |                  |
| Decq et al., 2015   | N=239<br>52 (49-55.75)   | France<br>Male         | Union                 | C: NI<br>R: NI                                  | Yes<br>N=138<br>Retired sportsmen registered on "high-level" lists | Cross sectional study: To evaluate the prevalence of major depressive disorder, mild cognitive disorders and headache in retired high                                 | Head Impact Test (HIT-6 (telephonic)                       | Disabling headache (HIT-6 $\geq$ 50) | 15.53%        | 12.82%           |



|                    |             |            |       |                              |    |                                                                                                                                     |               |          |      |  |
|--------------------|-------------|------------|-------|------------------------------|----|-------------------------------------------------------------------------------------------------------------------------------------|---------------|----------|------|--|
|                    |             |            |       |                              |    | level sportsmen and rugby players                                                                                                   |               |          |      |  |
| Gallo et al., 2021 | N=143<br>70 | UK<br>Male | Union | C: 15.8<br>(SD 5.4)<br>R: NI | No | Cross sectional study: To assess long term association between concussions and cognitive function among retired elite rugby players | Questionnaire | Diabetes | 4.1% |  |

N = number participants, SD = Standard Deviation, NI = Not identified, CR = Retired community level rugby players, C= mean career duration (year), R= mean years since retirement.
